# Supplementary material for: The activity origin of C-N-Cu electrocatalysts for ethanol formation in the CO2 reduction reaction under working conditions
Source: Royal Society of Chemistry journal article supplement (doi:10.1039/d3ta05325c), 2024-01-01
Supplement: d3ta05325c1.pdf [file d3ta05325c1.pdf]

## Supporting information

### The Activity Origin of C-N-Cu Electrocatalysts for Ethanol Formation in CO<sub>2</sub> Reduction Reaction under Working Condition

Xiaotao Zhang,<sup>a</sup> Jiao Chen,<sup>a</sup> Guoying Gao,<sup>\*b</sup> Hongyan Wang,<sup>a</sup> Yongliang Tang,<sup>a</sup> Bai Sun,<sup>\*c</sup> Yuxiang Ni,<sup>a</sup> Yuanzheng Chen,<sup>\*a</sup> and Yuan Ping Feng<sup>d</sup>

<sup>a</sup> School of Physical Science and Technology, Southwest Jiaotong University, Chengdu 610031, China. E-mail: [cyz@swjtu.edu.cn](mailto:cyz@swjtu.edu.cn)

<sup>b</sup> Center for High Pressure Science (CHiPS), State Key Laboratory of Metastable Materials Science and Technology, Yanshan University, Qinhuangdao, Hebei066004, China. E-mail: [gaoguoying@ysu.edu.cn](mailto:gaoguoying@ysu.edu.cn)

<sup>c</sup> Frontier Institute of Science and Technology (FIST), Xi'an Jiaotong University, Xi'an, Shaanxi 710049, China. E-mail: [baisun@xjtu.edu.cn](mailto:baisun@xjtu.edu.cn)

<sup>d</sup> Department of Physics and Centre for Advanced Two-Dimensional Materials, National University of Singapore, Singapore 117551.

#### Contents

|                                                                                    |              |
|------------------------------------------------------------------------------------|--------------|
| Computational details.                                                             | PageS2-S3    |
| Table S1-S3 Calculated E, ZPE and TS for reactants.                                | Page S4      |
| Figure S1 C_N substrates with two hydrogens adsorbed.                              | Page S5      |
| Figure S2The configurations of Cu <sub>N</sub> in the air.                         | Page S6      |
| Figure S3second-order difference of total energies of Cu <sub>N</sub> cluster.     | Page S7      |
| Figure S4 Energy-potential curve for C-N-Cu <sub>3</sub> and C-N-Cu <sub>5</sub> . | Page S8      |
| Figure S5 Free energy of CO <sub>2</sub> reduction under specific potentials.      | Page S9      |
| Figure S6 hexahedral structure of C-N-Cu <sub>5</sub> .                            | Page S10     |
| Figure S7 Bader Change analysis of C-N-Cu <sub>3</sub> and C-N-Cu <sub>5</sub> .   | Page S11     |
| Atomic coordinates                                                                 | Page S12-S15 |

#### Corresponding Authors:

Yuanzheng Chen Email: [cyz@swjtu.edu.cn](mailto:cyz@swjtu.edu.cn)

Guoying Gao Email: [gaoguoying@ysu.edu.cn](mailto:gaoguoying@ysu.edu.cn)

Bai Sun Email: [baisun@xjtu.edu.cn](mailto:baisun@xjtu.edu.cn)

## 1. Computational Details

### 1.1 Free energy calculations

The Gibbs free energy change ( $\Delta G$ ) is calculated as  $\Delta G = \Delta E + \Delta ZPE - T\Delta S$ .  $\Delta E$  is the DFT energy difference, and  $\Delta ZPE$  and  $T\Delta S$  are the change of zero point energies and entropy calculated by the following equations:

$$ZPE = \frac{1}{2} \sum_i hv_i$$

$$S_{\text{vib}}(T) = R \sum_i \left\{ \frac{hv_i}{kT} \frac{e^{-\frac{hv_i}{kT}}}{1 - e^{-\frac{hv_i}{kT}}} - \ln \left( 1 - e^{-\frac{hv_i}{kT}} \right) \right\}$$

The T is set to be 298.15K. The calculated data of reactants are listed in Table.

### 1.2 Binding energy

The binding energy expressed as

$$E_{\text{binding}}(\text{Cu}_N) = E(\text{C-N-Cu}_N) - E(\text{C-N substrate}) - E(\text{Cu}_N)$$

where right three terms represent total energy of C-N-Cu<sub>N</sub>, clean C-N substrate and pure Cu<sub>N</sub> cluster. The more negative the value, the easier the corresponding structure can be combined with the substrate.

### 1.3 Second-order difference of the total energies

The second-order difference of the total energies is used to evaluate the stability of the cluster structure. Its value is expressed as

$$\Delta^2 E = E(\text{Cu}_{N+1}) + E(\text{Cu}_{N-1}) - 2E(\text{Cu}_N)$$

. And the structure corresponding to the maximum value is considered stable.

### 1.4 D-band center

To analyze the adsorption ability of catalysts quantitatively, the d-band center are calculated as follows

$$\varepsilon_d = \frac{\int_{-\infty}^{\infty} \varepsilon \rho_d d\varepsilon}{\int_{-\infty}^{\infty} \rho_d d\varepsilon}$$

where  $\varepsilon$  represents energy and  $\rho_d$  is the d partial electronic density of states. Take the value as an indicator, the adsorption capacity is proportional to the value of d-band-center.

### 1.5 CO<sub>2</sub> reduction to CO

The Conversion of CO<sub>2</sub> to CO is a two-proton-coupled electron transfer process involving intermediates (\*CO<sub>2</sub>, \*COOH and \*CO) where \* represents catalysts. The elementary reaction can be expressed as followed:

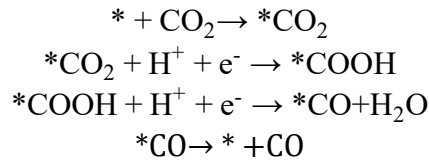

The free energy calculations based on CHE model can be written as:

$$\Delta G_1 = E_{* \text{CO}_2} + \text{ZPE}_{* \text{CO}_2} - \text{TS}_{* \text{CO}_2} - (E_{(* + \text{CO}_2)} + \text{ZPE}_{(* + \text{CO}_2)} - \text{TS}_{(* + \text{CO}_2)})$$

$$\Delta G_2 = E_{* \text{COOH}} + \text{ZPE}_{* \text{COOH}} - \text{TS}_{* \text{COOH}} - (E_{\text{CO}_2} + \text{ZPE}_{\text{CO}_2} - \text{TS}_{\text{CO}_2} + \frac{E_{\text{H}_2}}{2} + \frac{\text{ZPE}_{\text{H}_2}}{2} - \frac{\text{TS}_{\text{H}_2}}{2})$$

$$\Delta G_3 = E_{* \text{CO}} + \text{ZPE}_{* \text{CO}} - \text{TS}_{* \text{CO}} + E_{\text{H}_2\text{O}} + \text{ZPE}_{\text{H}_2\text{O}} - \text{TS}_{\text{H}_2\text{O}} - (E_{(* \text{COOH})} + \text{ZPE}_{(* \text{COOH})} - \text{TS}_{(* \text{COOH})} + \frac{E_{\text{H}_2}}{2} + \frac{\text{ZPE}_{\text{H}_2}}{2} - \frac{\text{TS}_{\text{H}_2}}{2})$$

$$\Delta G_4 = E_{(* + \text{CO})} + \text{ZPE}_{(* + \text{CO})} - \text{TS}_{(* + \text{CO})} - (E_{* \text{CO}} + \text{ZPE}_{* \text{CO}} - \text{TS}_{* \text{CO}})$$

**Table S1.** Calculated ZPE and TS for CO<sub>2</sub>RR to CO on C-N-Cu<sub>3</sub> and C-N-Cu<sub>5</sub>

|                     |                  | ZPE  | TS   |
|---------------------|------------------|------|------|
| C-N-Cu <sub>3</sub> | *CO <sub>2</sub> | 0.28 | 0.24 |
|                     | *COOH            | 0.60 | 0.23 |
|                     | *CO              | 0.18 | 0.21 |
| C-N-Cu <sub>5</sub> | *CO <sub>2</sub> | 0.29 | 0.24 |
|                     | *COOH            | 0.59 | 0.15 |
|                     | *CO              | 0.19 | 0.20 |

**Table S2.** Calculated ZPE and TS for CO<sub>2</sub>RR to ethanol on C-N-Cu<sub>5</sub>

|                                   | ZPE  | TS   |
|-----------------------------------|------|------|
| *COCO                             | 0.37 | 0.35 |
| *OCOCH                            | 0.62 | 0.40 |
| *COCHO                            | 0.70 | 0.29 |
| *CHOCHO                           | 0.87 | 0.44 |
| *OCHOCH                           | 1.03 | 0.27 |
| *OCHOCH <sub>2</sub>              | 1.29 | 0.33 |
| *OCHOHCH <sub>2</sub>             | 1.61 | 0.32 |
| *OCHCH <sub>2</sub>               | 1.20 | 0.23 |
| *OCHCH <sub>3</sub>               | 1.49 | 0.31 |
| *OCH <sub>2</sub> CH <sub>3</sub> | 1.82 | 0.34 |

**Table S3.** Calculated E<sub>DFT</sub>, ZPE, TS for molecular in CO<sub>2</sub>RR

|                                  | E <sub>DFT</sub> | ZPE  | TS   |
|----------------------------------|------------------|------|------|
| H <sub>2</sub>                   | -6.77            | 0.30 | 0.40 |
| H <sub>2</sub> O                 | -14.23           | 0.58 | 0.67 |
| CO <sub>2</sub>                  | -23.00           | 0.31 | 0.67 |
| CO                               | -14.80           | 0.14 | 0.62 |
| C <sub>2</sub> H <sub>5</sub> OH | -46.88           | 2.11 | 0.36 |

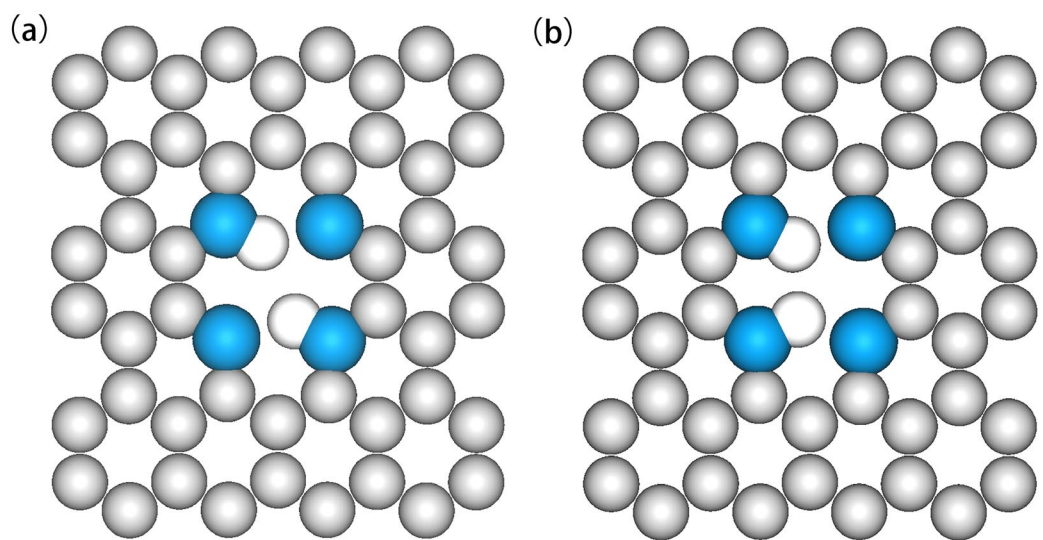

**Figure S1.** C<sub>N</sub> substrate with two hydrogens adsorbed: a) diagonal hydrogen atoms; b) adjacent hydrogen atoms

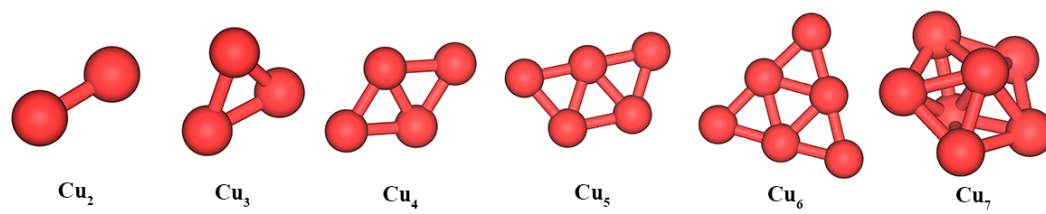

**Figure S2.** The configurations of  $\text{Cu}_N$  in the air.

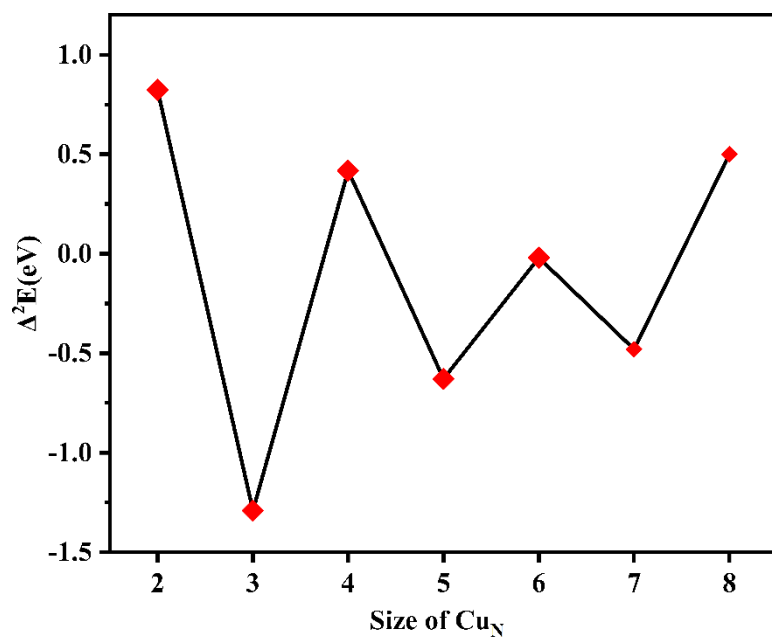

**Figure S3.** Second-order difference of total energies of Cu<sub>N</sub> cluster in the air.

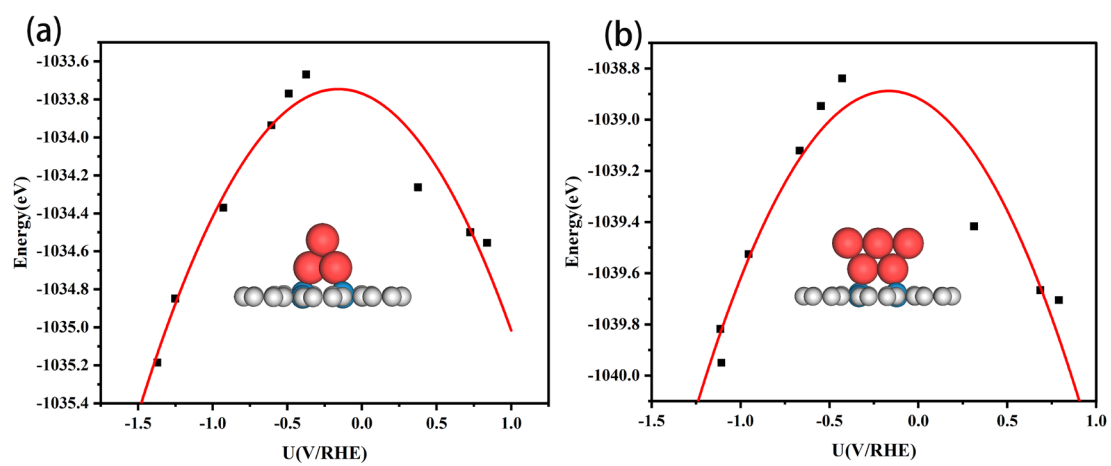

**Figure S4.** Fitted Energy-potential curve for (a) C-N-Cu<sub>3</sub> and (b) C-N-Cu<sub>5</sub> with constant potential method.



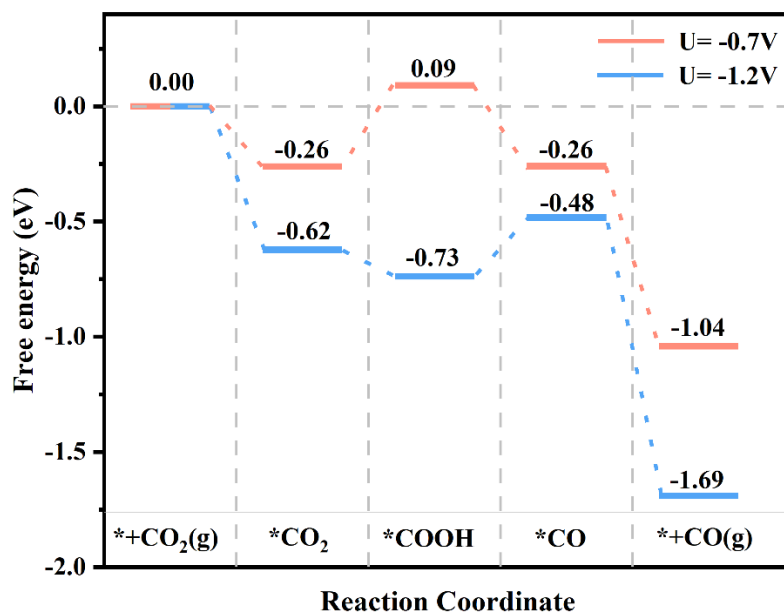

**Figure S5.** The free energy step diagram of CO<sub>2</sub> reduction to CO under specific potentials.

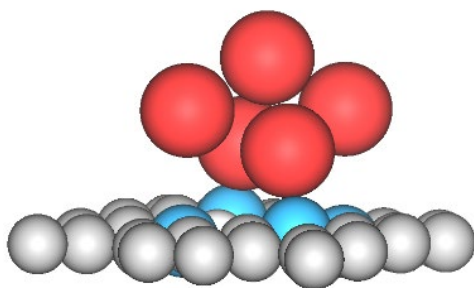

**Figure S6.** The stable hexahedral structure of C-N-Cu<sub>5</sub> which is optimized under non-aqueous environment.

(a)

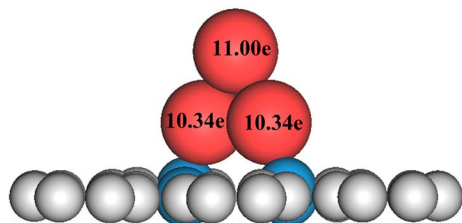

(b)

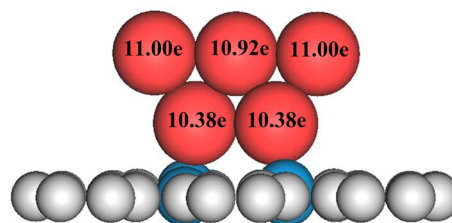

**Figure S7.** The valance electron of (a)  $\text{Cu}_3$  and (b)  $\text{Cu}_5$  calculated by Bader Charge analysis. The copper atoms at the bottom of the C-N- $\text{Cu}_3$  and C-N- $\text{Cu}_5$  molecules that are interacting with nitrogen lose 0.66e and 0.62e, respectively. The electrons of the up-middle copper atom in C-N- $\text{Cu}_5$  are losing 0.08e, whilst the electrons of the other two coppers at the angle of C-N- $\text{Cu}_5$  and the top copper in C-N- $\text{Cu}_3$  stay constant.

### The atomic coordinates

#### (1) Cu2

|                    |                    |                    |     |
|--------------------|--------------------|--------------------|-----|
| 0.5868773130720107 | 0.5739136741989520 | 0.6411131991654587 | Cu1 |
| 0.4797726599279932 | 0.5171163268010409 | 0.6782767998345361 | Cu2 |

#### (2) Cu3

|                    |                    |                    |     |
|--------------------|--------------------|--------------------|-----|
| 0.4765529828924561 | 0.5153189683147229 | 0.6793395461257844 | Cu1 |
| 0.5485435924203922 | 0.4514785388246503 | 0.6029010363062729 | Cu2 |
| 0.4341434136871556 | 0.3891425368606200 | 0.6431394085679356 | Cu3 |

#### (3) Cu4

|                    |                    |                    |     |
|--------------------|--------------------|--------------------|-----|
| 0.5905745141101002 | 0.5758749142849661 | 0.6398360314395012 | Cu1 |
| 0.4760851347895466 | 0.5151606498228131 | 0.6795522594292216 | Cu2 |
| 0.5484963717255620 | 0.4510009480944903 | 0.6026865302571841 | Cu3 |
| 0.4346639853747958 | 0.3897834927977299 | 0.6431451768740896 | Cu4 |

#### (4) Cu4

|                    |                    |                    |     |
|--------------------|--------------------|--------------------|-----|
| 0.5905745141101002 | 0.5758749142849661 | 0.6398360314395012 | Cu1 |
| 0.4760851347895466 | 0.5151606498228131 | 0.6795522594292216 | Cu2 |
| 0.5484963717255620 | 0.4510009480944903 | 0.6026865302571841 | Cu3 |
| 0.4346639853747958 | 0.3897834927977299 | 0.6431451768740896 | Cu4 |

#### (5) Cu5

|                    |                    |                    |     |
|--------------------|--------------------|--------------------|-----|
| 0.5229067505353442 | 0.5691594356362142 | 0.6025722924641930 | Cu1 |
| 0.4975631714627709 | 0.5030272610178949 | 0.7052637632322465 | Cu2 |
| 0.4687153352258888 | 0.4408944043473386 | 0.6013108595565002 | Cu3 |
| 0.5491885021544856 | 0.6290384973715287 | 0.7059125326140649 | Cu4 |
| 0.4439062266215122 | 0.3779504476270177 | 0.7036505221329959 | Cu5 |

#### (6) Cu6

|                    |                    |                    |     |
|--------------------|--------------------|--------------------|-----|
| 0.5164201387324489 | 0.5698754811208806 | 0.5984686142468754 | Cu1 |
| 0.4935945099241920 | 0.5031587917263848 | 0.7025141915498631 | Cu2 |
| 0.4711373546443335 | 0.4408352193712413 | 0.6003956699786841 | Cu3 |
| 0.5407887115532555 | 0.6357662601141921 | 0.7026450106561251 | Cu4 |
| 0.5171092086946455 | 0.5693689596634373 | 0.8026842219504147 | Cu5 |
| 0.5625801074511160 | 0.6985352430038527 | 0.6005722846180415 | Cu6 |

#### (7) Cu7

|                    |                    |                    |     |
|--------------------|--------------------|--------------------|-----|
| 0.5022112087416890 | 0.4910019038577218 | 0.5120480866703774 | Cu1 |
| 0.5073726002968948 | 0.6107159163164543 | 0.5772702936515977 | Cu2 |
| 0.6181898243299987 | 0.5242682156002018 | 0.5734070006793697 | Cu3 |
| 0.5715674775986069 | 0.3903084596087101 | 0.5727302822996468 | Cu4 |
| 0.4320605703070104 | 0.3938785187701778 | 0.5763148706633018 | Cu5 |
| 0.3924309492961262 | 0.5300016472600704 | 0.5791585289221250 | Cu6 |
| 0.5065273214296722 | 0.4886053585866618 | 0.6394909421135926 | Cu6 |

#### (8) C-N-Cu

|                    |                    |                    |    |
|--------------------|--------------------|--------------------|----|
| 0.0000000008293323 | 0.0829534563774832 | 0.4999999903629910 | C1 |
| 0.0714688928622983 | 0.2077540294978927 | 0.4999999808244401 | C2 |
| 0.0000000005026329 | 0.1664338753720708 | 0.4999999807046589 | C3 |
| 0.0716273048955180 | 0.0417753558335255 | 0.5000000061218159 | C4 |

|                    |                    |                    |     |
|--------------------|--------------------|--------------------|-----|
| 0.1431945021568964 | 0.0829585362819582 | 0.5000000125077487 | C5  |
| 0.2143433456634119 | 0.2081455652321550 | 0.5000000081050336 | C6  |
| 0.1429980031666078 | 0.1665786792612668 | 0.5000000019830164 | C7  |
| 0.2149180158367666 | 0.0418706361920544 | 0.5000000281991703 | C8  |
| 0.2864131666313490 | 0.0835517034650744 | 0.5000000382795093 | C9  |
| 0.3574738316822488 | 0.2098811196979171 | 0.5000000328971611 | C10 |
| 0.2862641967868438 | 0.1675390917874567 | 0.5000000392056393 | C11 |
| 0.3579605622191561 | 0.0422375509568894 | 0.5000000260861205 | C12 |
| 0.4291297884625572 | 0.0846692297220338 | 0.499999991504139  | C13 |
| 0.4999999996682954 | 0.2129838649122604 | 0.4999999957500027 | C14 |
| 0.4292284474715979 | 0.1691733165503916 | 0.5000000038048836 | C15 |
| 0.4999999995394220 | 0.0421031443359945 | 0.4999999800414311 | C16 |
| 0.5708702090814053 | 0.0846692321936784 | 0.4999999707554308 | C17 |
| 0.6425261601649971 | 0.2098811248871727 | 0.5000000219900724 | C18 |
| 0.5707715494479437 | 0.1691733173748522 | 0.4999999830841470 | C19 |
| 0.6420394358049943 | 0.0422375574816190 | 0.4999999806208990 | C20 |
| 0.7135868301233108 | 0.0835517051658161 | 0.4999999900314170 | C21 |
| 0.7856566510932647 | 0.2081455698741295 | 0.5000000068116084 | C22 |
| 0.7137357983200815 | 0.1675390946517802 | 0.5000000110483510 | C23 |
| 0.7850819821129803 | 0.0418706408049724 | 0.4999999815339481 | C24 |
| 0.8568054923899936 | 0.0829585402996738 | 0.4999999821620953 | C25 |
| 0.9285311054747548 | 0.2077540288474731 | 0.4999999784017421 | C26 |
| 0.8570019964737369 | 0.1665786853547667 | 0.4999999885055013 | C27 |
| 0.9283726950189829 | 0.0417753538734190 | 0.4999999877524230 | C28 |
| 0.0000000037323177 | 0.3328358278102447 | 0.4999999758666445 | C29 |
| 0.0707111652154517 | 0.4581140903266497 | 0.5000000014963404 | C30 |
| 0.0000000009172124 | 0.4163418727606953 | 0.4999999836017215 | C31 |
| 0.0712096138553000 | 0.2913991085130149 | 0.4999999744372799 | C32 |
| 0.1421188996311543 | 0.3328625924109047 | 0.4999999787478009 | C33 |
| 0.2117968514254126 | 0.4584244510995482 | 0.5000000109098984 | C34 |
| 0.1414621120819288 | 0.4165210872679884 | 0.5000000035864161 | C35 |
| 0.2135671443956721 | 0.2915718192432336 | 0.4999999854227893 | C36 |
| 0.2843190991105964 | 0.3334696605820525 | 0.4999999968708603 | C37 |
| 0.3528768077851341 | 0.4576916678086575 | 0.4999999904568306 | C38 |
| 0.2826176333341912 | 0.4169522915744432 | 0.5000000059764956 | C39 |
| 0.3565831294764603 | 0.2939525205721978 | 0.5000000202866072 | C40 |
| 0.4267543111197138 | 0.3390222563766651 | 0.5000000219061501 | C41 |
| 0.4999999972404014 | 0.2982362820638576 | 0.5000000631633839 | C42 |
| 0.5732456862034040 | 0.3390222565609103 | 0.5000000685808403 | C43 |
| 0.6471231940408658 | 0.4576916681338516 | 0.5000000164221878 | C44 |
| 0.6434168658882358 | 0.2939525285239339 | 0.5000000583709118 | C45 |
| 0.7156808973220894 | 0.3334696701078431 | 0.5000000415529288 | C46 |
| 0.7882031528636471 | 0.4584244556322498 | 0.4999999876552558 | C47 |
| 0.7173823650855099 | 0.4169522980448849 | 0.5000000119735725 | C48 |

|                    |                    |                    |     |
|--------------------|--------------------|--------------------|-----|
| 0.7864328482156862 | 0.2915718241345320 | 0.5000000183416714 | C49 |
| 0.8578810904837720 | 0.3328625960678291 | 0.4999999920328735 | C50 |
| 0.9292888295566488 | 0.4581140915665364 | 0.4999999809982660 | C51 |
| 0.8585378875001716 | 0.4165210913022558 | 0.4999999802825583 | C52 |
| 0.9287903808426371 | 0.2913991109780428 | 0.4999999804847446 | C53 |
| 0.0000000016034271 | 0.5836581291178170 | 0.5000000150938606 | C54 |
| 0.0712096207592485 | 0.7086008912458450 | 0.5000000162651648 | C55 |
| 0.0000000039944121 | 0.6671641727438542 | 0.5000000223375825 | C56 |
| 0.0707111685470665 | 0.5418859109020676 | 0.5000000156456662 | C57 |
| 0.1414621147964274 | 0.5834789108916620 | 0.5000000136580068 | C58 |
| 0.2135671500068722 | 0.7084281793810422 | 0.4999999813282234 | C59 |
| 0.1421189045433635 | 0.6671374043504936 | 0.5000000039295899 | C60 |
| 0.2117968459658081 | 0.5415755463281433 | 0.5000000053455684 | C61 |
| 0.2826176409545962 | 0.5830477014062563 | 0.4999999854264577 | C62 |
| 0.3565831399890556 | 0.7060474665230253 | 0.4999999409833622 | C63 |
| 0.2843190996576802 | 0.6665303271478339 | 0.4999999612119191 | C64 |
| 0.3528768095322685 | 0.5423083299460996 | 0.4999999925770994 | C65 |
| 0.5000000012948830 | 0.7017637148244151 | 0.4999999381898406 | C66 |
| 0.4267543229142688 | 0.6609777359758044 | 0.4999999495722314 | C67 |
| 0.6434168640296876 | 0.7060474772054771 | 0.4999999751238829 | C68 |
| 0.5732456841336141 | 0.6609777441862872 | 0.4999999754526564 | C69 |
| 0.6471231862916016 | 0.5423083320813943 | 0.4999999943216226 | C70 |
| 0.7173823546728667 | 0.5830477042520714 | 0.4999999813401426 | C71 |
| 0.7864328538877747 | 0.7084281767079562 | 0.5000000156994889 | C72 |
| 0.7156809006852767 | 0.6665303304067528 | 0.4999999982244679 | C73 |
| 0.7882031433564524 | 0.5415755531597084 | 0.4999999810256996 | C74 |
| 0.8585378811348532 | 0.5834789069436177 | 0.4999999935040209 | C75 |
| 0.9287903843966246 | 0.7086008938768817 | 0.5000000240259314 | C76 |
| 0.8578811007457444 | 0.6671374072431432 | 0.5000000198045041 | C77 |
| 0.9292888324512016 | 0.5418859126378534 | 0.4999999977108385 | C78 |
| 0.0000000022816374 | 0.8335661247704294 | 0.5000000182744205 | C79 |
| 0.0716273079349139 | 0.9582246442193189 | 0.5000000124689513 | C80 |
| 0.0000000005506654 | 0.9170465442667216 | 0.5000000106190641 | C81 |
| 0.0714688954003845 | 0.7922459707519856 | 0.5000000192104156 | C82 |
| 0.1429980082510602 | 0.8334213180472789 | 0.5000000091470141 | C83 |
| 0.2149180191607689 | 0.9581293635134291 | 0.5000000175993605 | C84 |
| 0.1431945091828118 | 0.9170414593818450 | 0.5000000161893885 | C85 |
| 0.2143433464792787 | 0.7918544301146697 | 0.4999999912972451 | C86 |
| 0.2862642029854097 | 0.8324609084855129 | 0.4999999836650060 | C87 |
| 0.3579605665792647 | 0.9577624457120760 | 0.5000000210695057 | C88 |
| 0.2864131688341351 | 0.9164482917726821 | 0.5000000097398271 | C89 |
| 0.3574738398908459 | 0.7901188705723171 | 0.4999999697054797 | C90 |
| 0.4292284525291348 | 0.8308266845740614 | 0.5000000144822772 | C91 |
| 0.5000000000004720 | 0.9578968571785781 | 0.5000000207606793 | C92 |

|                    |                    |                     |      |
|--------------------|--------------------|---------------------|------|
| 0.4291297867526975 | 0.9153307720226441 | 0.5000000304028178  | C93  |
| 0.5000000006464245 | 0.7870161370537185 | 0.5000000021469445  | C94  |
| 0.5707715522107629 | 0.8308266864172289 | 0.4999999946189777  | C95  |
| 0.6420394332034479 | 0.9577624519709339 | 0.4999999762889195  | C96  |
| 0.5708702129692123 | 0.9153307732957445 | 0.5000000031200500  | C97  |
| 0.6425261668620136 | 0.7901188776813736 | 0.4999999634305076  | C98  |
| 0.7137357997221877 | 0.8324609123727165 | 0.4999999613668908  | C99  |
| 0.7850819844173580 | 0.9581293652089095 | 0.4999999709407893  | C100 |
| 0.7135868335983400 | 0.9164482932020516 | 0.4999999631130584  | C101 |
| 0.7856566569250624 | 0.7918544314681004 | 0.4999999942183644  | C102 |
| 0.8570019938833549 | 0.8334213228554982 | 0.4999999993087236  | C103 |
| 0.9283726944578681 | 0.9582246441521529 | 0.4999999947526725  | C104 |
| 0.8568054970131243 | 0.9170414605119603 | 0.4999999872907185  | C105 |
| 0.9285311085916141 | 0.7922459686330907 | 0.5000000183640543  | C106 |
| 0.4219002583478422 | 0.5806119835224537 | 0.4999999983916713  | N1   |
| 0.5780997461671878 | 0.5806119877325039 | 0.4999999926472191  | N2   |
| 0.4219002608194030 | 0.4193880053301915 | 0.4999999949467814  | N3   |
| 0.5780997386883924 | 0.4193880032845216 | 0.50000000619101237 | N4   |
| 0.5000000055228516 | 0.4999999927056703 | 0.5000000245497012  | Cu1  |
